# Supplementary material
Source: publisher site journal article supplement (https://static.cambridge.org/content/id/urn:cambridge.org:id:article:S1138741620000116/resource/name/S1138741620000116supp001.docx)
Supplement: Supplementary file 1 [file S1138741620000116supp001.docx]

**An examination of the Spanish translation of the 50-item IPIP Big-five inventory in a Spanish speaking Peruvian sample**

**SUPPLEMENTARY TABLES**

Table S1: Spanish translation of IPIP-50-S

| **English** | **Spanish** |
| --- | --- |
| Get stressed out easily (+N) | Me estreso con facilidad (+N) |
| Am relaxed most of the time (-N) | Estoy relajado la mayor parte del tiempo (-N) |
| Worry about things (+N) | Me preocupo por todo (+N) |
| Seldom feel blue (-N) | Rara vez me siento triste (-N) |
| Am easily disturbed (+N) | Me molesto fácilmente (+N) |
| Get upset easily (+N) | Me disgusto con facilidad (+N) |
| Change my mood a lot (+N) | Cambio mucho de humor (+N) |
| Have frequent mood swings (+N) | Tengo cambios frecuentes de estado de ánimo (+N) |
| Get irritated easily (+N) | Me irrito fácilmente (+N) |
| Often feel blue (+N) | Me siento triste frecuentemente (+N) |
| Am the life of the party (+E) | Soy el alma de la fiesta (+E) |
| Don't talk a lot (-E) | No hablo mucho (-E) |
| Feel comfortable around people (+E) | Me siento cómodo con la gente (+E) |
| Keep in the background (-E) | Prefiero mantenerme al margen (-E) |
| Start conversations (+E) | Comienzo las conversaciones (+E) |
| Have little to say (-E) | No tengo mucho que decir (-E) |
| Talk to a lot of different people at parties (+E) | En las fiestas hablo con muchas personas diferentes (+E) |
| Don't like to draw attention to myself (-E) | No me gusta llamar la atención (-E) |
| Don't mind being the centre of attention (+E) | No me importa ser el centro de atención (+E) |
| Am quiet around strangers (-E) | Cuando estoy entre desconocidos me mantengo callado (-E) |
| Feel little concern for others (-A) | Me preocupo poco por los demás (-A) |
| Am interested in people (+A) | Me intereso por la gente (+A) |
| Insult people (-A) | Ofendo a la gente (-A) |
| Sympathize with others' feelings (+A) | Soy sensible hacia las emociones de otros (+A) |
| Am not interested in other people's problems (-A) | No me interesan los problemas de otras personas (-A) |
| Have a soft heart (+A) | Tengo un corazón sensible (+A) |
| Am not really interested in others (-A) | En realidad, no me intereso por los demás (-A) |
| Take time out for others (+A) | Dedico tiempo a los demás (+A) |
| Feel others' emotions (+A) | Siento las emociones de los otros (+A) |
| Make people feel at ease (+A) | Hago sentir cómoda a la gente (+A) |
| Have a rich vocabulary (+I) | Tengo un vocabulario amplio (+I) |
| Have difficulty understanding abstract ideas (-I) | Me cuesta entender ideas abstractas (-I) |
| Have a vivid imagination (+I) | Tengo mucha imaginación (+I) |
| Am not interested in abstract ideas (-I) | No me interesan las ideas abstractas (-I) |
| Have excellent ideas (+I) | Tengo excelentes ideas (+I) |
| Do not have a good imagination (-I) | No tengo una buena imaginación (-I) |
| Am quick to understand things (+I) | Soy rápido para entender las cosas (+I) |
| Use difficult words (+I) | Utilizo palabras difíciles (+I) |
| Spend time reflecting on things (+I) | Dedico tiempo a reflexionar (+I) |
| Am full of ideas (+I) | Estoy lleno de ideas (+I) |
| Am always prepared (+C) | Siempre estoy preparado (+C) |
| Leave my belongings around (-C) | Dejo mis pertenencias en cualquier lado (-C) |
| Pay attention to details (+C) | Pongo atención en los detalles (+C) |
| Make a mess of things (-C) | Soy desordenado (-C) |
| Get chores done right away (+C) | Realizo mis tareas inmediatamente (+C) |
| Often forget to put things back in their proper place (-C) | A menudo olvido poner las cosas en su lugar (-C) |
| Like order (+C) | Me gusta el orden (+C) |
| Shirk my duties (-C) | Evado mis obligaciones (-C) |
| Follow a schedule (+C) | Hago un programa y lo sigo (+C) |
| Am exacting in my work (+C) | Soy perfeccionista en mi trabajo (+C) |

Table S2: Model fit indices for single factor CFA models

|  | **x2** | ***df*** | **CFI** | **TLI** | **RMSEA** | **WRMR** |
| --- | --- | --- | --- | --- | --- | --- |
| Neuroticism | 180.562* | 35 | .97 | .96 | .073 | 1.119 |
| Extraversion | 690.143* | 35 | .44 | .27 | .155 | 2.818 |
| Agreeableness | 1678.044* | 35 | .45 | .29 | .246 | 4.303 |
| Intellect | 1040.536* | 35 | .65 | .55 | .192 | 3.279 |
| Conscientiousness | 1221.211* | 35 | .70 | .61 | .209 | 3.606 |

*Note: * p* < .001

Table S3: Standardized factor loadings for the single factor CFA model for Neuroticism

| **Item** | **Loading** | ***p-*value** |
| --- | --- | --- |
| Get stressed out easily (+N) | .522 | <.001 |
| Am relaxed most of the time (-N) | .203 | <.001 |
| Worry about things (+N) | .048 | .198 |
| Seldom feel blue (-N) | .243 | <.001 |
| Am easily disturbed (+N) | .692 | <.001 |
| Get upset easily (+N) | .777 | <.001 |
| Change my mood a lot (+N) | .661 | <.001 |
| Have frequent mood swings (+N) | .797 | <.001 |
| Get irritated easily (+N) | .798 | <.001 |
| Often feel blue (+N) | .685 | <.001 |

Table S4: Standardized factor loadings for the single factor CFA model for Extraversion

| **Item** | **Loading** | ***p-*value** |
| --- | --- | --- |
| Am the life of the party (+E) | .248 | <.001 |
| Don't talk a lot (-E) | .316 | <.001 |
| Feel comfortable around people (+E) | .253 | <.001 |
| Keep in the background (-E) | .470 | <.001 |
| Start conversations (+E) | .294 | <.001 |
| Have little to say (-E) | .460 | <.001 |
| Talk to a lot of different people at parties (+E) | .342 | <.001 |
| Don't like to draw attention to myself (-E) | .471 | <.001 |
| Don't mind being the center of attention (+E) | .486 | <.001 |
| Am quiet around strangers (-E) | .340 | <.001 |

Table S5: Standardized factor loadings for the single factor CFA model for Agreeableness

| **Item** | **Loading** | ***p-*value** |
| --- | --- | --- |
| Feel little concern for others (-A) | .121 | <.001 |
| Am interested in people (+A) | .597 | <.001 |
| Insult people (-A) | -.207 | <.001 |
| Sympathize with others' feelings (+A) | .675 | <.001 |
| Am not interested in other people's problems (-A) | -.337 | <.001 |
| Have a soft heart (+A) | .562 | <.001 |
| Am not really interested in others (-A) | -.375 | <.001 |
| Take time out for others (+A) | .597 | <.001 |
| Feel others' emotions (+A) | .683 | <.001 |
| Make people feel at ease (+A) | .516 | <.001 |

Table S6: Standardized factor loadings for the single factor CFA model for Intellect

| **Item** | **Loading** | ***p-*value** |
| --- | --- | --- |
| Have a rich vocabulary (+I) | .476 | <.001 |
| Have difficulty understanding abstract ideas (-I) | -.115 | .001 |
| Have a vivid imagination (+I) | .571 | <.001 |
| Am not interested in abstract ideas (-I) | -.080 | .023 |
| Have excellent ideas (+I) | .783 | <.001 |
| Do not have a good imagination (-I) | -.166 | <.001 |
| Am quick to understand things (+I) | .667 | <.001 |
| Use difficult words (+I) | .242 | <.001 |
| Spend time reflecting on things (+I) | .429 | <.001 |
| Am full of ideas (+I) | .674 | <.001 |

Table S7: Standardized factor loadings for the single factor CFA model for Conscientiousness

| **Item** | **Loading** | ***p-*value** |
| --- | --- | --- |
| Am always prepared (+C) | .537 | <.001 |
| Leave my belongings around (-C) | -.615 | <.001 |
| Pay attention to details (+C) | .595 | <.001 |
| Make a mess of things (-C) | -.662 | <.001 |
| Get chores done right away (+C) | .629 | <.001 |
| Often forget to put things back in their proper place (-C) | -.584 | <.001 |
| Like order (+C) | .627 | <.001 |
| Shirk my duties (-C) | -.544 | <.001 |
| Follow a schedule (+C) | .453 | <.001 |
| Am exacting in my work (+C) | .485 | <.001 |

Table S8: Factor loading matrix for the five factor CFA with positive and negative valence factors.

| **Items** | **Positive** | **Negative** | **N** | **E** | **A** | **I** | **C** |
| --- | --- | --- | --- | --- | --- | --- | --- |
| Get stressed out easily (+N) | .38 |  | .33 |  |  |  |  |
| Am relaxed most of the time (-N) |  | -.36 | .10 |  |  |  |  |
| Worry about things (+N) | .32 |  | -.62 |  |  |  |  |
| Seldom feel blue (-N) |  | -.53 | .09 |  |  |  |  |
| Am easily disturbed (+N) |  | -.46 | .48 |  |  |  |  |
| Get upset easily (+N) |  | -.50 | .60 |  |  |  |  |
| Change my mood a lot (+N) |  | -.49 | .40 |  |  |  |  |
| Have frequent mood swings (+N) |  | -.52 | .61 |  |  |  |  |
| Get irritated easily (+N) |  | -.50 | .59 |  |  |  |  |
| Often feel blue (+N) |  | -.49 | .50 |  |  |  |  |
| Am the life of the party (+E) | .26 |  |  | -.41 |  |  |  |
| Don't talk a lot (-E) |  | -.39 |  | .35 |  |  |  |
| Feel comfortable around people (+E) | .29 |  |  | -.65 |  |  |  |
| Keep in the background (-E) |  | -.47 |  | .09 |  |  |  |
| Start conversations (+E) | .39 |  |  | -.46 |  |  |  |
| Have little to say (-E) |  | -.49 |  | .33 |  |  |  |
| Talk to a lot of different people at parties (+E) | .34 |  |  | -.20 |  |  |  |
| Don't like to draw attention to myself (-E) |  | -.33 |  | .02 |  |  |  |
| Don't mind being the center of attention (+E) | .40 |  |  | .07 |  |  |  |
| Am quiet around strangers (-E) |  | -.32 |  | .22 |  |  |  |
| Feel little concern for others (-A) |  | -.41 |  |  | .01 |  |  |
| Am interested in people (+A) | .38 |  |  |  | -.55 |  |  |
| Insult people (-A) |  | -.55 |  |  | .60 |  |  |
| Sympathize with others' feelings (+A) | .53 |  |  |  | -.24 |  |  |
| Am not interested in other people's problems (-A) |  | -.43 |  |  | .51 |  |  |
| Have a soft heart (+A) | .47 |  |  |  | -.18 |  |  |
| Am not really interested in others (-A) |  | -.43 |  |  | .62 |  |  |
| Take time out for others (+A) | .48 |  |  |  | -.42 |  |  |
| Feel others' emotions (+A) | .51 |  |  |  | -.33 |  |  |
| Make people feel at ease (+A) | .37 |  |  |  | -.62 |  |  |
| Have a rich vocabulary (+I) | .37 |  |  |  |  | -.36 |  |
| Have difficulty understanding abstract ideas (-I) |  | -.46 |  |  |  | .41 |  |
| Have a vivid imagination (+I) | .34 |  |  |  |  | -.45 |  |
| Am not interested in abstract ideas (-I) |  | -.47 |  |  |  | .38 |  |
| Have excellent ideas (+I) | .43 |  |  |  |  | -.52 |  |
| Do not have a good imagination (-I) |  | -.46 |  |  |  | .52 |  |
| Am quick to understand things (+I) | .31 |  |  |  |  | -.60 |  |
| Use difficult words (+I) | .51 |  |  |  |  | .20 |  |
| Spend time reflecting on things (+I) | .42 |  |  |  |  | -.34 |  |
| Am full of ideas (+I) | .40 |  |  |  |  | -.53 |  |
| Am always prepared (+C) | .38 |  |  |  |  |  | -.53 |
| Leave my belongings around (-C) |  | -.45 |  |  |  |  | .51 |
| Pay attention to details (+C) | .34 |  |  |  |  |  | -.61 |
| Make a mess of things (-C) |  | -.41 |  |  |  |  | .59 |
| Get chores done right away (+C) | .34 |  |  |  |  |  | -.60 |
| Often forget to put things back in their proper place (-C) |  | -.47 |  |  |  |  | .53 |
| Like order (+C) | .27 |  |  |  |  |  | -.57 |
| Shirk my duties (-C) |  | -.54 |  |  |  |  | .60 |
| Follow a schedule (+C) | .32 |  |  |  |  |  | -.48 |
| Am exacting in my work (+C) | .45 |  |  |  |  |  | -.48 |
| ***Factor correlations*** | **Positive** | **Negative** | **N** | **E** | **A** | **I** | **C** |
| **Positive** | - |  |  |  |  |  |  |
| **Negative** | -.89 | - |  |  |  |  |  |
| **N** | - | - | - |  |  |  |  |
| **E** | - | - | .59 | - |  |  |  |
| **A** | - | - | .68 | .63 | - |  |  |
| **I** | - | - | .67 | .60 | .77 | - |  |
| **C** | - | - | .74 | .48 | .74 | .85 | - |

Table S9: Factor loading matrix for the five factor CFA with general method factor.

| **Items** | **Method** | **N** | **E** | **A** | **I** | **C** |
| --- | --- | --- | --- | --- | --- | --- |
| Get stressed out easily (+N) | .35 | .35 |  |  |  |  |
| Am relaxed most of the time (-N) | .36 | .08 |  |  |  |  |
| Worry about things (+N) | .52 | -.57 |  |  |  |  |
| Seldom feel blue (-N) | .31 | .07 |  |  |  |  |
| Am easily disturbed (+N) | .45 | .49 |  |  |  |  |
| Get upset easily (+N) | .49 | .61 |  |  |  |  |
| Change my mood a lot (+N) | .47 | .42 |  |  |  |  |
| Have frequent mood swings (+N) | .50 | .62 |  |  |  |  |
| Get irritated easily (+N) | .48 | .61 |  |  |  |  |
| Often feel blue (+N) | .48 | .52 |  |  |  |  |
| Am the life of the party (+E) | .26 |  | .41 |  |  |  |
| Don't talk a lot (-E) | .38 |  | -.36 |  |  |  |
| Feel comfortable around people (+E) | .28 |  | .64 |  |  |  |
| Keep in the background (-E) | .46 |  | -.12 |  |  |  |
| Start conversations (+E) | .38 |  | .47 |  |  |  |
| Have little to say (-E) | .48 |  | -.35 |  |  |  |
| Talk to a lot of different people at parties (+E) | .33 |  | .22 |  |  |  |
| Don't like to draw attention to myself (-E) | .33 |  | -.04 |  |  |  |
| Don't mind being the center of attention (+E) | .39 |  | -.04 |  |  |  |
| Am quiet around strangers (-E) | .31 |  | -.24 |  |  |  |
| Feel little concern for others (-A) | .40 |  |  | -.03 |  |  |
| Am interested in people (+A) | .37 |  |  | .56 |  |  |
| Insult people (-A) | .54 |  |  | -.62 |  |  |
| Sympathize with others' feelings (+A) | .51 |  |  | .26 |  |  |
| Am not interested in other people's problems (-A) | .42 |  |  | -.52 |  |  |
| Have a soft heart (+A) | .46 |  |  | .20 |  |  |
| Am not really interested in others (-A) | .42 |  |  | -.63 |  |  |
| Take time out for others (+A) | .46 |  |  | .43 |  |  |
| Feel others' emotions (+A) | .50 |  |  | .36 |  |  |
| Make people feel at ease (+A) | .36 |  |  | .63 |  |  |
| Have a rich vocabulary (+I) | .36 |  |  |  | .37 |  |
| Have difficulty understanding abstract ideas (-I) | .45 |  |  |  | -.42 |  |
| Have a vivid imagination (+I) | .33 |  |  |  | .46 |  |
| Am not interested in abstract ideas (-I) | .46 |  |  |  | -.40 |  |
| Have excellent ideas (+I) | .42 |  |  |  | .53 |  |
| Do not have a good imagination (-I) | .44 |  |  |  | -.53 |  |
| Am quick to understand things (+I) | .30 |  |  |  | .60 |  |
| Use difficult words (+I) | .49 |  |  |  | -.17 |  |
| Spend time reflecting on things (+I) | .41 |  |  |  | .36 |  |
| Am full of ideas (+I) | .38 |  |  |  | .54 |  |
| Am always prepared (+C) | .37 |  |  |  |  | .54 |
| Leave my belongings around (-C) | .44 |  |  |  |  | -.52 |
| Pay attention to details (+C) | .34 |  |  |  |  | .61 |
| Make a mess of things (-C) | .40 |  |  |  |  | -.60 |
| Get chores done right away (+C) | .34 |  |  |  |  | .60 |
| Often forget to put things back in their proper place (-C) | .46 |  |  |  |  | -.54 |
| Like order (+C) | .27 |  |  |  |  | .57 |
| Shirk my duties (-C) | .53 |  |  |  |  | -.61 |
| Follow a schedule (+C) | .31 |  |  |  |  | .49 |
| Am exacting in my work (+C) | .44 |  |  |  |  | .50 |
| ***Factor correlations*** | **Method** | **N** | **E** | **A** | **I** | **C** |
| **Method** | - |  |  |  |  |  |
| **N** | - | - |  |  |  |  |
| **E** | - | -.60 | - |  |  |  |
| **A** | - | -.68 | .64 | - |  |  |
| **I** | - | -.67 | .61 | .77 | - |  |
| **C** | - | -.74 | .50 | .75 | .86 | - |

Table S10: Factor loading matrix for the five factor ESEM using CF-Parsimax Oblique rotation.

| **Items** | **1** | **2** | **3** | **4** | **5** |
| --- | --- | --- | --- | --- | --- |
| Get stressed out easily (+N) | **0.412** | 0.145 | 0.109 | -0.083 | -0.005 |
| Am relaxed most of the time (-N) | -0.182 | 0.218 | **0.347** | 0.141 | -0.255 |
| Worry about things (+N) | -0.09 | **0.459** | 0.206 | 0.132 | **0.378** |
| Seldom feel blue (-N) | 0.097 | 0.258 | 0.013 | 0.109 | -0.225 |
| Am easily disturbed (+N) | **0.58** | 0.031 | 0.195 | -0.025 | 0.025 |
| Get upset easily (+N) | **0.581** | 0.049 | 0.21 | 0.003 | -0.141 |
| Change my mood a lot (+N) | **0.505** | 0.053 | 0.232 | 0.02 | 0.033 |
| Have frequent mood swings (+N) | **0.655** | 0.034 | 0.151 | 0.035 | -0.155 |
| Get irritated easily (+N) | **0.664** | 0.1 | 0.1 | -0.026 | -0.144 |
| Often feel blue (+N) | **0.503** | 0.177 | 0.214 | -0.098 | -0.085 |
| Am the life of the party (+E) | -0.255 | 0.207 | 0.088 | **0.334** | -0.14 |
| Don't talk a lot (-E) | 0.185 | 0.112 | **0.433** | -0.166 | 0.173 |
| Feel comfortable around people (+E) | -0.232 | **0.324** | 0.041 | 0.262 | 0.086 |
| Keep in the background (-E) | 0.123 | 0.208 | **0.388** | -0.031 | 0.166 |
| Start conversations (+E) | -0.149 | **0.336** | -0.053 | **0.431** | -0.239 |
| Have little to say (-E) | 0.186 | 0.136 | **0.46** | -0.057 | 0.092 |
| Talk to a lot of different people at parties (+E) | -0.035 | 0.08 | 0.066 | **0.423** | -0.187 |
| Don't like to draw attention to myself (-E) | **0.39** | 0.092 | -0.087 | 0.154 | 0.056 |
| Don't mind being the center of attention (+E) | **0.39** | 0.192 | -0.148 | 0.2 | -0.092 |
| Am quiet around strangers (-E) | **0.359** | 0.147 | 0.095 | -0.112 | 0.148 |
| Feel little concern for others (-A) | 0.067 | 0.065 | **0.358** | 0.135 | 0.115 |
| Am interested in people (+A) | -0.128 | **0.446** | -0.006 | 0.245 | 0.139 |
| Insult people (-A) | **0.304** | -0.007 | **0.407** | 0.106 | **-0.314** |
| Sympathize with others' feelings (+A) | 0.06 | **0.798** | -0.015 | -0.132 | 0.03 |
| Am not interested in other people's problems (-A) | 0.114 | -0.204 | **0.628** | 0.109 | -0.095 |
| Have a soft heart (+A) | 0.129 | **0.65** | -0.055 | -0.087 | 0.022 |
| Am not really interested in others (-A) | 0.193 | -0.232 | **0.627** | 0.047 | -0.098 |
| Take time out for others (+A) | 0.084 | **0.418** | -0.1 | **0.33** | 0.037 |
| Feel others' emotions (+A) | 0.156 | **0.594** | -0.202 | 0.207 | -0.063 |
| Make people feel at ease (+A) | -0.177 | 0.232 | 0.064 | **0.443** | 0.179 |
| Have a rich vocabulary (+I) | -0.125 | 0.183 | 0.111 | **0.403** | 0.023 |
| Have difficulty understanding abstract ideas (-I) | 0.05 | 0.185 | **0.521** | -0.124 | -0.138 |
| Have a vivid imagination (+I) | -0.083 | 0.207 | 0.006 | **0.407** | 0.081 |
| Am not interested in abstract ideas (-I) | 0.096 | 0.059 | **0.468** | 0.054 | -0.184 |
| Have excellent ideas (+I) | 0.06 | -0.007 | 0.008 | **0.684** | 0.145 |
| Do not have a good imagination (-I) | 0.109 | 0.043 | **0.557** | -0.08 | -0.17 |
| Am quick to understand things (+I) | 0.134 | 0 | -0.105 | **0.533** | **0.347** |
| Use difficult words (+I) | **0.382** | -0.026 | 0.06 | **0.397** | -0.183 |
| Spend time reflecting on things (+I) | 0.172 | 0.232 | -0.011 | 0.275 | 0.235 |
| Am full of ideas (+I) | 0.007 | 0.032 | -0.007 | **0.635** | 0.127 |
| Am always prepared (+C) | -0.085 | 0.15 | 0.18 | **0.347** | **0.372** |
| Leave my belongings around (-C) | 0.126 | 0.174 | 0.278 | 0.063 | **-0.499** |
| Pay attention to details (+C) | -0.204 | **0.302** | 0.164 | 0.242 | **0.376** |
| Make a mess of things (-C) | 0.113 | 0.127 | 0.295 | 0.053 | **-0.564** |
| Get chores done right away (+C) | -0.021 | 0.243 | 0.079 | 0.235 | **0.474** |
| Often forget to put things back in their proper place (-C) | 0.239 | 0.243 | 0.254 | -0.06 | **-0.403** |
| Like order (+C) | 0.113 | 0.188 | 0.032 | 0.122 | **0.624** |
| Shirk my duties (-C) | 0.262 | -0.006 | **0.442** | 0.1 | **-0.356** |
| Follow a schedule (+C) | -0.011 | 0.148 | -0.005 | **0.374** | 0.226 |
| Am exacting in my work (+C) | 0.019 | 0.077 | 0.171 | **0.454** | **0.336** |

Table S11: Factor loading matrix for the five factor ESEM using Oblimin Oblique rotation.

| **Items** | **1** | | **2** | | **3** | | **4** | | **5** | |
| --- | --- | --- | --- | --- | --- | --- | --- | --- | --- | --- |
| Get stressed out easily (+N) | | **0.444** | | -0.062 | | 0.074 | | 0.134 | | -0.064 |
| Am relaxed most of the time (-N) | | -0.167 | | 0.104 | | **0.44** | | 0.18 | | 0.205 |
| Worry about things (+N) | | -0.107 | | **0.342** | | 0.156 | | **0.416** | | -0.262 |
| Seldom feel blue (-N) | | 0.133 | | 0.062 | | 0.062 | | 0.223 | | 0.204 |
| Am easily disturbed (+N) | | **0.616** | | 0.006 | | 0.136 | | 0.013 | | -0.103 |
| Get upset easily (+N) | | **0.631** | | -0.022 | | 0.188 | | 0.024 | | 0.031 |
| Change my mood a lot (+N) | | **0.537** | | 0.061 | | 0.181 | | 0.029 | | -0.096 |
| Have frequent mood swings (+N) | | **0.712** | | 0.001 | | 0.123 | | 0.005 | | 0.053 |
| Get irritated easily (+N) | | **0.723** | | -0.056 | | 0.068 | | 0.077 | | 0.038 |
| Often feel blue (+N) | | **0.546** | | -0.095 | | 0.191 | | 0.161 | | -0.029 |
| Am the life of the party (+E) | | -0.248 | | **0.329** | | 0.159 | | 0.154 | | 0.215 |
| Don't talk a lot (-E) | | 0.181 | | -0.065 | | **0.389** | | 0.114 | | -0.256 |
| Feel comfortable around people (+E) | | -0.237 | | **0.345** | | 0.062 | | 0.277 | | 0.031 |
| Keep in the background (-E) | | 0.122 | | 0.081 | | **0.356** | | 0.189 | | -0.199 |
| Start conversations (+E) | | -0.119 | | **0.399** | | 0.031 | | 0.263 | | **0.336** |
| Have little to say (-E) | | 0.191 | | 0.025 | | **0.437** | | 0.12 | | -0.168 |
| Talk to a lot of different people at parties (+E) | | -0.012 | | **0.392** | | 0.122 | | 0.017 | | 0.255 |
| Don't like to draw attention to myself (-E) | | **0.42** | | 0.19 | | -0.135 | | 0.06 | | -0.016 |
| Don't mind being the center of attention (+E) | | **0.437** | | 0.19 | | -0.163 | | 0.147 | | 0.124 |
| Am quiet around strangers (-E) | | **0.375** | | -0.038 | | 0.031 | | 0.143 | | -0.183 |
| Feel little concern for others (-A) | | 0.064 | | 0.22 | | **0.34** | | 0.034 | | -0.111 |
| Am interested in people (+A) | | -0.125 | | **0.356** | | -0.005 | | **0.392** | | -0.011 |
| Insult people (-A) | | **0.346** | | 0.03 | | **0.456** | | -0.042 | | 0.183 |
| Sympathize with others' feelings (+A) | | 0.091 | | -0.044 | | -0.004 | | **0.768** | | -0.029 |
| Am not interested in other people's problems (-A) | | 0.116 | | 0.108 | | **0.648** | | -0.226 | | -0.012 |
| Have a soft heart (+A) | | 0.161 | | -0.017 | | -0.055 | | **0.622** | | -0.016 |
| Am not really interested in others (-A) | | 0.198 | | 0.039 | | **0.638** | | -0.246 | | -0.035 |
| Take time out for others (+A) | | 0.111 | | **0.401** | | -0.1 | | **0.351** | | 0.086 |
| Feel others' emotions (+A) | | 0.201 | | 0.245 | | -0.186 | | **0.532** | | 0.148 |
| Make people feel at ease (+A) | | -0.185 | | **0.563** | | 0.06 | | 0.165 | | -0.004 |
| Have a rich vocabulary (+I) | | -0.121 | | **0.462** | | 0.134 | | 0.12 | | 0.092 |
| Have difficulty understanding abstract ideas (-I) | | 0.063 | | -0.122 | | **0.563** | | 0.175 | | -0.005 |
| Have a vivid imagination (+I) | | -0.079 | | **0.483** | | 0.011 | | 0.144 | | 0.062 |
| Am not interested in abstract ideas (-I) | | 0.115 | | 0.033 | | **0.512** | | 0.032 | | 0.078 |
| Have excellent ideas (+I) | | 0.066 | | **0.778** | | -0.018 | | -0.097 | | 0.067 |
| Do not have a good imagination (-I) | | 0.123 | | -0.099 | | **0.597** | | 0.033 | | 0.016 |
| Am quick to understand things (+I) | | 0.128 | | **0.685** | | -0.187 | | -0.067 | | -0.118 |
| Use difficult words (+I) | | **0.428** | | **0.358** | | 0.068 | | -0.09 | | 0.207 |
| Spend time reflecting on things (+I) | | 0.18 | | **0.403** | | -0.068 | | 0.181 | | -0.11 |
| Am full of ideas (+I) | | 0.011 | | **0.722** | | -0.024 | | -0.052 | | 0.076 |
| Am always prepared (+C) | | -0.108 | | **0.534** | | 0.123 | | 0.097 | | -0.208 |
| Leave my belongings around (-C) | | 0.177 | | -0.076 | | **0.387** | | 0.14 | | **0.356** |
| Pay attention to details (+C) | | -0.231 | | **0.437** | | 0.122 | | 0.258 | | -0.221 |
| Make a mess of things (-C) | | 0.167 | | -0.114 | | **0.417** | | 0.096 | | **0.401** |
| Get chores done right away (+C) | | -0.045 | | **0.454** | | -0.008 | | 0.202 | | **-0.303** |
| Often forget to put things back in their proper place (-C) | | 0.291 | | -0.164 | | **0.331** | | 0.22 | | 0.246 |
| Like order (+C) | | 0.083 | | **0.383** | | -0.105 | | 0.164 | | **-0.456** |
| Shirk my duties (-C) | | **0.304** | | 0.01 | | **0.505** | | -0.041 | | 0.212 |
| Follow a schedule (+C) | | -0.015 | | **0.495** | | -0.042 | | 0.093 | | -0.065 |
| Am exacting in my work (+C) | | 0.005 | | **0.626** | | 0.111 | | 0.011 | | -0.161 |

Table S12: Factor loading matrix for the five factor ESEM using Target rotation.

| **Items** | **1** | **2** | **3** | **4** | **5** |
| --- | --- | --- | --- | --- | --- |
| Get stressed out easily (+N) | **0.462** | 0.066 | 0.096 | -0.048 | 0.047 |
| Am relaxed most of the time (-N) | -0.158 | 0.296 | 0.121 | 0.142 | **0.34** |
| Worry about things (+N) | -0.015 | **0.376** | **0.392** | 0.091 | **-0.328** |
| Seldom feel blue (-N) | 0.098 | -0.011 | 0.254 | 0.088 | 0.261 |
| Am easily disturbed (+N) | **0.637** | 0.083 | -0.046 | 0.052 | 0.017 |
| Get upset easily (+N) | **0.627** | 0.056 | -0.03 | 0.081 | 0.195 |
| Change my mood a lot (+N) | **0.562** | 0.128 | -0.032 | 0.093 | 0.013 |
| Have frequent mood swings (+N) | **0.692** | -0.017 | -0.027 | 0.115 | 0.197 |
| Get irritated easily (+N) | **0.706** | -0.035 | 0.052 | 0.039 | 0.186 |
| Often feel blue (+N) | **0.568** | 0.13 | 0.094 | -0.045 | 0.154 |
| Am the life of the party (+E) | -0.276 | 0.093 | 0.197 | 0.297 | 0.161 |
| Don't talk a lot (-E) | 0.283 | **0.422** | -0.035 | -0.107 | -0.086 |
| Feel comfortable around people (+E) | -0.227 | 0.141 | **0.321** | 0.206 | -0.069 |
| Keep in the background (-E) | 0.209 | **0.4** | 0.079 | 0.004 | -0.086 |
| Start conversations (+E) | -0.188 | -0.047 | **0.369** | **0.37** | 0.25 |
| Have little to say (-E) | 0.275 | **0.418** | -0.015 | 0.003 | -0.001 |
| Talk to a lot of different people at parties (+E) | -0.069 | -0.015 | 0.075 | **0.422** | 0.191 |
| Don't like to draw attention to myself (-E) | **0.395** | -0.121 | 0.112 | 0.17 | -0.07 |
| Don't mind being the center of attention (+E) | **0.38** | -0.19 | 0.232 | 0.195 | 0.083 |
| Am quiet around strangers (-E) | **0.419** | 0.104 | 0.101 | -0.085 | -0.115 |
| Feel little concern for others (-A) | 0.119 | **0.317** | -0.045 | 0.181 | -0.062 |
| Am interested in people (+A) | -0.11 | 0.129 | **0.452** | 0.176 | -0.119 |
| Insult people (-A) | **0.339** | 0.2 | -0.134 | 0.192 | **0.397** |
| Sympathize with others' feelings (+A) | 0.134 | 0.194 | **0.787** | -0.234 | 0.055 |
| Am not interested in other people's problems (-A) | 0.169 | **0.423** | **-0.394** | 0.231 | 0.181 |
| Have a soft heart (+A) | 0.186 | 0.105 | **0.653** | -0.167 | 0.039 |
| Am not really interested in others (-A) | 0.254 | **0.409** | **-0.425** | 0.179 | 0.185 |
| Take time out for others (+A) | 0.083 | -0.027 | **0.451** | 0.274 | -0.033 |
| Feel others' emotions (+A) | 0.161 | -0.092 | **0.652** | 0.12 | 0.081 |
| Make people feel at ease (+A) | -0.181 | 0.13 | 0.226 | **0.408** | -0.184 |
| Have a rich vocabulary (+I) | -0.133 | 0.116 | 0.162 | **0.386** | -0.013 |
| Have difficulty understanding abstract ideas (-I) | 0.134 | **0.456** | 0.019 | -0.076 | 0.261 |
| Have a vivid imagination (+I) | -0.097 | 0.04 | 0.216 | **0.377** | -0.089 |
| Am not interested in abstract ideas (-I) | 0.148 | **0.34** | -0.084 | 0.118 | 0.277 |
| Have excellent ideas (+I) | 0.019 | -0.051 | 0.008 | **0.699** | -0.194 |
| Do not have a good imagination (-I) | 0.183 | **0.428** | -0.132 | -0.002 | 0.284 |
| Am quick to understand things (+I) | 0.109 | -0.09 | 0.041 | **0.537** | **-0.416** |
| Use difficult words (+I) | **0.36** | -0.112 | -0.04 | **0.45** | 0.18 |
| Spend time reflecting on things (+I) | 0.191 | 0.042 | 0.234 | 0.262 | -0.242 |
| Am full of ideas (+I) | -0.033 | -0.044 | 0.051 | **0.637** | -0.171 |
| Am always prepared (+C) | -0.055 | 0.25 | 0.101 | **0.347** | **-0.37** |
| Leave my belongings around (-C) | 0.139 | 0.126 | 0.091 | 0.09 | **0.59** |
| Pay attention to details (+C) | -0.16 | **0.308** | 0.256 | 0.206 | **-0.356** |
| Make a mess of things (-C) | 0.121 | 0.115 | 0.04 | 0.088 | **0.657** |
| Get chores done right away (+C) | 0.022 | 0.216 | 0.218 | 0.213 | **-0.477** |
| Often forget to put things back in their proper place (-C) | 0.276 | 0.141 | 0.159 | -0.035 | **0.5** |
| Like order (+C) | 0.172 | 0.191 | 0.169 | 0.114 | **-0.642** |
| Shirk my duties (-C) | 0.297 | 0.227 | -0.142 | 0.186 | **0.447** |
| Follow a schedule (+C) | -0.014 | 0.043 | 0.157 | **0.357** | -0.248 |
| Am exacting in my work (+C) | 0.036 | 0.186 | 0.032 | **0.473** | **-0.346** |
